# Supplementary material for: Aurora-A down-regulates IkappaBα via Akt activation and interacts with insulin-like growth factor-1 induced phosphatidylinositol 3-kinase pathway for cancer cell survival
Source: PubMed Central journal article supplement (PMC2780390; doi:10.1186/1476-4598-8-95), 2009-11-05
Supplement: 1476-4598-8-95-S1.pdf [file 1476-4598-8-95-S1.pdf]

|   |   |   |   |   |   |   |   |   |
|---|---|---|---|---|---|---|---|---|
| I | - | + | - | - | + | + | - | + |
| V | - | - | + | - | + | - | + | + |
| W | - | - | - | + | - | + | + | + |

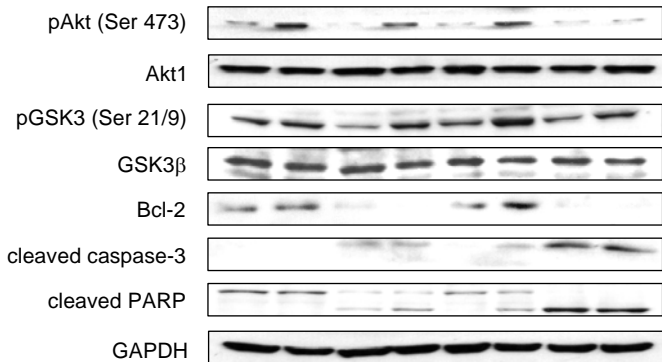

Additional file 1
