# Supplementary material for: Aurora-A down-regulates IkappaBα via Akt activation and interacts with insulin-like growth factor-1 induced phosphatidylinositol 3-kinase pathway for cancer cell survival
Source: PubMed Central journal article supplement (PMC2780390; doi:10.1186/1476-4598-8-95), 2009-11-05
Supplement: 1476-4598-8-95-S2.pdf [file 1476-4598-8-95-S2.pdf]

**a**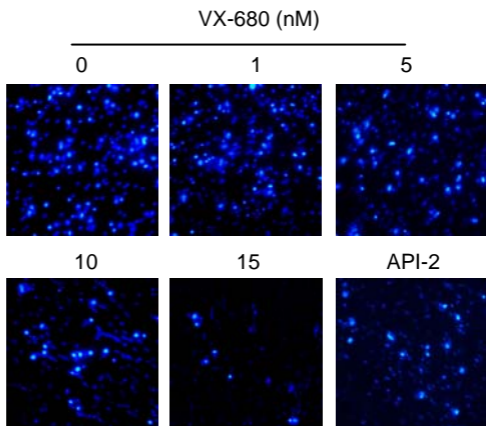**b**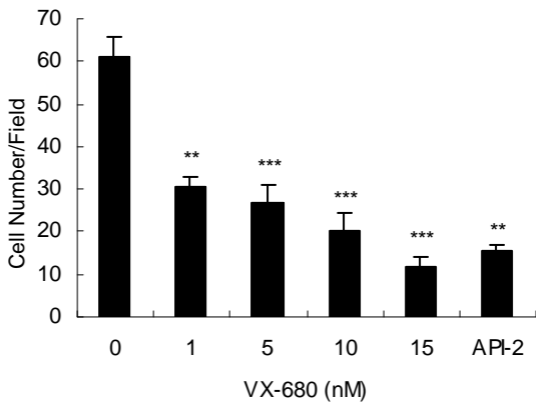

Additional file 2
